# Supplementary material
Source: publisher figshare collection journal article supplement (https://gsajournals.figshare.com/ndownloader/files/28864914)
Supplement: Supplementary file 1 [file 28864914]

## Sheet: Table S13.1
Table S13.1: List of 119 Spodoptera-specific orthogroups with gene IDs.
Orthogroup	Bmori1	Harmigera1	Hvirescens1	Hzea1	Sexigua1	Sfrugiperda1	Slitura1	Tni1
OG0000234					augustus_masked-tulip_contig_571_pilon_pilon-processed-gene-04-mRNA-1, augustus_masked-tulip_contig_571_pilon_pilon-processed-gene-05-mRNA-1, maker-tulip_contig_571_pilon_pilon-augustus-gene-024-mRNA-1, maker-tulip_contig_571_pilon_pilon-augustus-gene-025-mRNA-1, maker-tulip_contig_571_pilon_pilon-augustus-gene-026-mRNA-1, maker-tulip_contig_571_pilon_pilon-augustus-gene-027-mRNA-1, maker-tulip_c…	SFR01510, SFR03224, SFR05896, SFR05897, SFR08592, SFR08593, SFR09344, SFR09345, SFR09346, SFR18529	SWUSl0040240, SWUSl0040250, SWUSl0040260, SWUSl0040270, SWUSl0040280, SWUSl0040290, SWUSl0040300, SWUSl0040310, SWUSl0040320, SWUSl0040330, SWUSl0040350
OG0000439					augustus_masked-tulip_contig_120_pilon_pilon-processed-gene-024-mRNA-1, augustus_masked-tulip_contig_387_pilon_pilon-processed-gene-10-mRNA-1, augustus_masked-tulip_contig_43_pilon_pilon-processed-gene-47-mRNA-1, augustus_masked-tulip_contig_732_pilon_pilon-processed-gene-418-mRNA-1, augustus_masked-tulip_contig_819_pilon_pilon-processed-gene-123-mRNA-1, augustus_masked-tulip_contig_860_pilon_pil…	SFR03076, SFR04624, SFR09279, SFR10821	SWUSl0023850, SWUSl0035000, SWUSl0048670, SWUSl0069750, SWUSl0081050, SWUSl0090490, SWUSl0107260, SWUSl0115190, SWUSl0125800, SWUSl0147260
OG0000440					augustus_masked-tulip_contig_184_pilon_pilon-processed-gene-01-mRNA-1, augustus_masked-tulip_contig_184_pilon_pilon-processed-gene-02-mRNA-1, augustus_masked-tulip_contig_235_pilon_pilon-processed-gene-03-mRNA-1, augustus_masked-tulip_contig_272_pilon_pilon-processed-gene-482-mRNA-1, augustus_masked-tulip_contig_29_pilon_pilon-processed-gene-06-mRNA-1, augustus_masked-tulip_contig_327_pilon_pilon…	SFR01860	SWUSl0145270, SWUSl0146560
OG0000630					augustus_masked-tulip_contig_556_pilon_pilon-processed-gene-031-mRNA-1, augustus_masked-tulip_contig_556_pilon_pilon-processed-gene-032-mRNA-1, augustus_masked-tulip_contig_891_pilon_pilon-processed-gene-010-mRNA-1, augustus_masked-tulip_contig_891_pilon_pilon-processed-gene-011-mRNA-1, augustus_masked-tulip_contig_891_pilon_pilon-processed-gene-019-mRNA-1, augustus_masked-tulip_contig_891_pilon_…	SFR01203	SWUSl0045430, SWUSl0143350, SWUSl0143380, SWUSl0143400, SWUSl0143410, SWUSl0143420, SWUSl0143440, SWUSl0143460
OG0003233					augustus_masked-tulip_contig_121_pilon_pilon-processed-gene-045-mRNA-1, augustus_masked-tulip_contig_263_pilon_pilon-processed-gene-031-mRNA-1	SFR18561	SWUSl0000840, SWUSl0022620, SWUSl0031440, SWUSl0091160, SWUSl0092190, SWUSl0103070, SWUSl0125970
OG0003234					maker-tulip_contig_199_pilon_pilon-augustus-gene-4109-mRNA-1, maker-tulip_contig_199_pilon_pilon-augustus-gene-4137-mRNA-1	SFR12066	SWUSl0054090, SWUSl0054100, SWUSl0054110, SWUSl0054120, SWUSl0054130, SWUSl0054140, SWUSl0054150
OG0005246					augustus_masked-tulip_contig_306_pilon_pilon-processed-gene-04-mRNA-1, augustus_masked-tulip_contig_306_pilon_pilon-processed-gene-09-mRNA-1, maker-tulip_contig_306_pilon_pilon-augustus-gene-017-mRNA-1, maker-tulip_contig_84_pilon_pilon-augustus-gene-020-mRNA-1, maker-tulip_contig_84_pilon_pilon-augustus-gene-023-mRNA-1	SFR09507, SFR12563, SFR19484	SWUSl0150680
OG0005248					augustus_masked-tulip_contig_811_pilon_pilon-processed-gene-012-mRNA-1	SFR06191, SFR10046	SWUSl0085370, SWUSl0085820, SWUSl0086250, SWUSl0129650, SWUSl0143720, SWUSl0152870
OG0009367					augustus_masked-tulip_contig_194_pilon_pilon-processed-gene-029-mRNA-1, augustus_masked-tulip_contig_454_pilon_pilon-processed-gene-211-mRNA-1, augustus_masked-tulip_contig_547_pilon_pilon-processed-gene-54-mRNA-1, augustus_masked-tulip_contig_572_pilon_pilon-processed-gene-070-mRNA-1	SFR01053	SWUSl0038080, SWUSl0085410, SWUSl0085420
OG0009370					maker-tulip_contig_305_pilon_pilon-augustus-gene-00-mRNA-1, maker-tulip_contig_362_pilon_pilon-augustus-gene-715-mRNA-1, maker-tulip_contig_407_pilon_pilon-augustus-gene-030-mRNA-1, maker-tulip_contig_58_pilon_pilon-augustus-gene-118-mRNA-1, maker-tulip_contig_59_pilon_pilon-augustus-gene-133-mRNA-1, maker-tulip_contig_623_pilon_pilon-augustus-gene-435-mRNA-1	SFR00086	SWUSl0141200
OG0009378					maker-tulip_contig_204_pilon_pilon-augustus-gene-117-mRNA-1, maker-tulip_contig_204_pilon_pilon-augustus-gene-118-mRNA-1	SFR09548, SFR12631, SFR21534, SFR21536	SWUSl0022770, SWUSl0046540
OG0009379					maker-tulip_contig_1_pilon_pilon-augustus-gene-211-mRNA-1	SFR21065, SFR21713	SWUSl0094700, SWUSl0094710, SWUSl0107210, SWUSl0107220, SWUSl0107230
OG0011092					augustus_masked-tulip_contig_43_pilon_pilon-processed-gene-0117-mRNA-1, augustus_masked-tulip_contig_43_pilon_pilon-processed-gene-0118-mRNA-1, maker-tulip_contig_43_pilon_pilon-augustus-gene-028-mRNA-1	SFR16124	SWUSl0048450, SWUSl0048460, SWUSl0048470
OG0011104					augustus_masked-tulip_contig_653_pilon_pilon-processed-gene-0165-mRNA-1	SFR08518, SFR09630	SWUSl0045760, SWUSl0078870, SWUSl0078880, SWUSl0124170
OG0011995					augustus_masked-tulip_contig_338_pilon_pilon-processed-gene-129-mRNA-1, augustus_masked-tulip_contig_371_pilon_pilon-processed-gene-00-mRNA-1, augustus_masked-tulip_contig_387_pilon_pilon-processed-gene-02-mRNA-1, augustus_masked-tulip_contig_855_pilon_pilon-processed-gene-07-mRNA-1	SFR10091	SWUSl0144480
OG0011996					maker-tulip_contig_42_pilon_pilon-augustus-gene-02-mRNA-1	SFR09758	SWUSl0016820, SWUSl0016840, SWUSl0016850, SWUSl0016870
OG0011999					augustus_masked-tulip_contig_171_pilon_pilon-processed-gene-05-mRNA-1, maker-tulip_contig_353_pilon_pilon-augustus-gene-00-mRNA-1	SFR00834, SFR20773	SWUSl0147320, SWUSl0147330
OG0012001					maker-tulip_contig_454_pilon_pilon-augustus-gene-412-mRNA-1	SFR02387, SFR02388, SFR03502, SFR03503	SWUSl0085130
OG0012003					augustus_masked-tulip_contig_174_pilon_pilon-processed-gene-012-mRNA-1, augustus_masked-tulip_contig_174_pilon_pilon-processed-gene-09-mRNA-1	SFR14792, SFR18123	SWUSl0056570, SWUSl0056690
OG0012007					augustus_masked-tulip_contig_484_pilon_pilon-processed-gene-021-mRNA-1, augustus_masked-tulip_contig_710_pilon_pilon-processed-gene-0114-mRNA-1, augustus_masked-tulip_contig_710_pilon_pilon-processed-gene-0115-mRNA-1, maker-tulip_contig_710_pilon_pilon-augustus-gene-084-mRNA-1	SFR10206	SWUSl0139260
OG0012672					augustus_masked-tulip_contig_515_pilon_pilon-processed-gene-247-mRNA-1	SFR12299, SFR19455	SWUSl0009550, SWUSl0114100
OG0012676					augustus_masked-tulip_contig_30_pilon_pilon-processed-gene-00-mRNA-1	SFR20910	SWUSl0115100, SWUSl0115110, SWUSl0115120
OG0012685					maker-tulip_contig_842_pilon_pilon-augustus-gene-014-mRNA-1	SFR10695, SFR18086	SWUSl0048320, SWUSl0152570
OG0012687					maker-tulip_contig_333_pilon_pilon-augustus-gene-131-mRNA-1, maker-tulip_contig_333_pilon_pilon-augustus-gene-135-mRNA-1	SFR19949, SFR19950	SWUSl0051710
OG0012692					maker-tulip_contig_199_pilon_pilon-augustus-gene-466-mRNA-1, maker-tulip_contig_199_pilon_pilon-augustus-gene-470-mRNA-1	SFR08539, SFR15522	SWUSl0054010
OG0012693					maker-tulip_contig_199_pilon_pilon-augustus-gene-469-mRNA-1	SFR07306, SFR10199	SWUSl0054160, SWUSl0099950
OG0012694					augustus_masked-tulip_contig_623_pilon_pilon-processed-gene-39-mRNA-1, maker-tulip_contig_623_pilon_pilon-augustus-gene-329-mRNA-1	SFR03253, SFR18340	SWUSl0071840
OG0012696					augustus_masked-tulip_contig_570_pilon_pilon-processed-gene-058-mRNA-1	SFR09912, SFR12692, SFR12703	SWUSl0081510
OG0012697					augustus_masked-tulip_contig_710_pilon_pilon-processed-gene-0102-mRNA-1, maker-tulip_contig_710_pilon_pilon-augustus-gene-013-mRNA-1, maker-tulip_contig_710_pilon_pilon-augustus-gene-02-mRNA-1	SFR10207	SWUSl0139270
OG0012699					maker-tulip_contig_220_pilon_pilon-augustus-gene-02-mRNA-1	SFR06734, SFR12679, SFR12680	SWUSl0103230
OG0012701					maker-tulip_contig_6_pilon_pilon-augustus-gene-00-mRNA-1	SFR00323, SFR04839, SFR10787	SWUSl0073850
OG0012702					maker-tulip_contig_872_pilon_pilon-augustus-gene-081-mRNA-1	SFR09011, SFR09012	SWUSl0117680, SWUSl0117690
OG0013283					maker-tulip_contig_560_pilon_pilon-augustus-gene-046-mRNA-1	SFR06821	SWUSl0000230, SWUSl0106340
OG0013287					augustus_masked-tulip_contig_407_pilon_pilon-processed-gene-932-mRNA-1	SFR05751	SWUSl0015100, SWUSl0015110
OG0013289					maker-tulip_contig_109_pilon_pilon-augustus-gene-118-mRNA-1, maker-tulip_contig_109_pilon_pilon-augustus-gene-121-mRNA-1	SFR13630	SWUSl0030900
OG0013292					maker-tulip_contig_195_pilon_pilon-augustus-gene-024-mRNA-1	SFR14268	SWUSl0111300, SWUSl0136870
OG0013296					maker-tulip_contig_44_pilon_pilon-augustus-gene-023-mRNA-1	SFR08789, SFR11505	SWUSl0099990
OG0013298					augustus_masked-tulip_contig_454_pilon_pilon-processed-gene-448-mRNA-1	SFR01580, SFR03132	SWUSl0084960
OG0013312					maker-tulip_contig_177_pilon_pilon-augustus-gene-127-mRNA-1	SFR18473	SWUSl0007120, SWUSl0148700
OG0013314					maker-tulip_contig_48_pilon_pilon-augustus-gene-010-mRNA-1	SFR07046, SFR11858	SWUSl0019270
OG0013317					maker-tulip_contig_690_pilon_pilon-augustus-gene-119-mRNA-1, maker-tulip_contig_690_pilon_pilon-augustus-gene-120-mRNA-1	SFR08864	SWUSl0066160
OG0013324					augustus_masked-tulip_contig_69_pilon_pilon-processed-gene-250-mRNA-1	SFR08351, SFR08355	SWUSl0131080
OG0013326					augustus_masked-tulip_contig_217_pilon_pilon-processed-gene-359-mRNA-1	SFR09118, SFR17188	SWUSl0034920
OG0013328					augustus_masked-tulip_contig_715_pilon_pilon-processed-gene-045-mRNA-1, maker-tulip_contig_333_pilon_pilon-augustus-gene-236-mRNA-1	SFR06806	SWUSl0101500
OG0013335					maker-tulip_contig_274_pilon_pilon-augustus-gene-117-mRNA-1	SFR05152, SFR12666	SWUSl0086950
OG0013339					augustus_masked-tulip_contig_516_pilon_pilon-processed-gene-14-mRNA-1	SFR12794, SFR18018	SWUSl0133230
OG0013342					maker-tulip_contig_640_pilon_pilon-augustus-gene-127-mRNA-1	SFR11678	SWUSl0093340, SWUSl0135310
OG0013351					maker-tulip_contig_479_pilon_pilon-augustus-gene-353-mRNA-1	SFR14319, SFR14320	SWUSl0006060
OG0013353					augustus_masked-tulip_contig_275_pilon_pilon-processed-gene-071-mRNA-1	SFR01781, SFR16418	SWUSl0086840
OG0013356					maker-tulip_contig_220_pilon_pilon-augustus-gene-04-mRNA-1	SFR06733, SFR12678	SWUSl0103220
OG0013357					maker-tulip_contig_220_pilon_pilon-augustus-gene-017-mRNA-1	SFR06732, SFR12677	SWUSl0103210
OG0013358					maker-tulip_contig_604_pilon_pilon-augustus-gene-362-mRNA-1	SFR02704, SFR10163	SWUSl0059180
OG0013359					augustus_masked-tulip_contig_247_pilon_pilon-processed-gene-06-mRNA-1	SFR14944, SFR16709	SWUSl0125160
OG0013360					maker-tulip_contig_161_pilon_pilon-augustus-gene-069-mRNA-1	SFR12164, SFR12165	SWUSl0077580
OG0013362					maker-tulip_contig_72_pilon_pilon-augustus-gene-028-mRNA-1	SFR14862, SFR20241	SWUSl0019720
OG0013363					maker-tulip_contig_72_pilon_pilon-augustus-gene-048-mRNA-1	SFR14861, SFR20242	SWUSl0019730
OG0013364					maker-tulip_contig_360_pilon_pilon-augustus-gene-228-mRNA-1	SFR07716, SFR20535	SWUSl0007020
OG0013365					augustus_masked-tulip_contig_209_pilon_pilon-processed-gene-1220-mRNA-1	SFR02905, SFR18418	SWUSl0064310
OG0013367					maker-tulip_contig_3_pilon_pilon-augustus-gene-619-mRNA-1	SFR00145, SFR04104	SWUSl0002780
OG0013374					maker-tulip_contig_412_pilon_pilon-augustus-gene-050-mRNA-1	SFR10347, SFR21672	SWUSl0052660
OG0014120					augustus_masked-tulip_contig_254_pilon_pilon-processed-gene-038-mRNA-1	SFR18621	SWUSl0056490
OG0014124					augustus_masked-tulip_contig_560_pilon_pilon-processed-gene-116-mRNA-1	SFR06830	SWUSl0001400
OG0014129					maker-tulip_contig_473_pilon_pilon-augustus-gene-136-mRNA-1	SFR10242	SWUSl0133490
OG0014131					maker-tulip_contig_596_pilon_pilon-augustus-gene-04-mRNA-1	SFR08180	SWUSl0081460
OG0014132					augustus_masked-tulip_contig_81_pilon_pilon-processed-gene-55-mRNA-1	SFR17074	SWUSl0081280
OG0014134					augustus_masked-tulip_contig_515_pilon_pilon-processed-gene-262-mRNA-1	SFR05419	SWUSl0009460
OG0014137					augustus_masked-tulip_contig_895_pilon_pilon-processed-gene-354-mRNA-1	SFR07486	SWUSl0000460
OG0014147					maker-tulip_contig_837_pilon_pilon-augustus-gene-920-mRNA-1	SFR01714	SWUSl0129200
OG0014150					augustus_masked-tulip_contig_47_pilon_pilon-processed-gene-01-mRNA-1	SFR14149	SWUSl0135080
OG0014151					maker-tulip_contig_687_pilon_pilon-augustus-gene-128-mRNA-1	SFR18946	SWUSl0110180
OG0014159					maker-tulip_contig_586_pilon_pilon-augustus-gene-45-mRNA-1	SFR00982	SWUSl0102500
OG0014161					augustus_masked-tulip_contig_287_pilon_pilon-processed-gene-1154-mRNA-1	SFR10495	SWUSl0032190
OG0014164					augustus_masked-tulip_contig_745_pilon_pilon-processed-gene-359-mRNA-1	SFR20559	SWUSl0016230
OG0014167					maker-tulip_contig_4_pilon_pilon-augustus-gene-08-mRNA-1	SFR03260	SWUSl0137710
OG0014171					augustus_masked-tulip_contig_381_pilon_pilon-processed-gene-028-mRNA-1	SFR02061	SWUSl0144330
OG0014176					maker-tulip_contig_690_pilon_pilon-augustus-gene-017-mRNA-1	SFR08874	SWUSl0066230
OG0014178					maker-tulip_contig_690_pilon_pilon-augustus-gene-341-mRNA-1	SFR18910	SWUSl0065740
OG0014179					maker-tulip_contig_690_pilon_pilon-augustus-gene-421-mRNA-1	SFR18894	SWUSl0065880
OG0014183					augustus_masked-tulip_contig_344_pilon_pilon-processed-gene-025-mRNA-1	SFR17086	SWUSl0081180
OG0014185					maker-tulip_contig_58_pilon_pilon-augustus-gene-050-mRNA-1	SFR13530	SWUSl0114640
OG0014189					maker-tulip_contig_317_pilon_pilon-augustus-gene-03-mRNA-1	SFR08959	SWUSl0056750
OG0014190					maker-tulip_contig_69_pilon_pilon-augustus-gene-02-mRNA-1	SFR18195	SWUSl0130770
OG0014194					augustus_masked-tulip_contig_217_pilon_pilon-processed-gene-465-mRNA-1	SFR17209	SWUSl0151390
OG0014196					maker-tulip_contig_187_pilon_pilon-augustus-gene-220-mRNA-1	SFR06889	SWUSl0070760
OG0014197					augustus_masked-tulip_contig_28_pilon_pilon-processed-gene-013-mRNA-1	SFR12584	SWUSl0073470
OG0014200					augustus_masked-tulip_contig_784_pilon_pilon-processed-gene-031-mRNA-1	SFR19241	SWUSl0021080
OG0014208					maker-tulip_contig_125_pilon_pilon-augustus-gene-0325-mRNA-1	SFR13679	SWUSl0076430
OG0014212					maker-tulip_contig_583_pilon_pilon-augustus-gene-272-mRNA-1	SFR13613	SWUSl0058470
OG0014214					maker-tulip_contig_322_pilon_pilon-augustus-gene-03-mRNA-1	SFR11848	SWUSl0019650
OG0014216					augustus_masked-tulip_contig_121_pilon_pilon-processed-gene-4104-mRNA-1	SFR11743	SWUSl0089620
OG0014217					maker-tulip_contig_121_pilon_pilon-augustus-gene-473-mRNA-1	SFR15371	SWUSl0133430
OG0014224					augustus_masked-tulip_contig_547_pilon_pilon-processed-gene-614-mRNA-1	SFR16605	SWUSl0131420
OG0014229					augustus_masked-tulip_contig_204_pilon_pilon-processed-gene-25-mRNA-1	SFR12643	SWUSl0022650
OG0014230					maker-tulip_contig_199_pilon_pilon-augustus-gene-429-mRNA-1	SFR08540	SWUSl0054020
OG0014231					maker-tulip_contig_199_pilon_pilon-augustus-gene-431-mRNA-1	SFR08541	SWUSl0054040
OG0014232					maker-tulip_contig_199_pilon_pilon-augustus-gene-433-mRNA-1	SFR06486	SWUSl0054070
OG0014233					maker-tulip_contig_199_pilon_pilon-augustus-gene-496-mRNA-1	SFR08542	SWUSl0054060
OG0014236					augustus_masked-tulip_contig_537_pilon_pilon-processed-gene-131-mRNA-1	SFR07109	SWUSl0044880
OG0014237					maker-tulip_contig_281_pilon_pilon-augustus-gene-125-mRNA-1	SFR09916	SWUSl0078990
OG0014238					maker-tulip_contig_281_pilon_pilon-augustus-gene-117-mRNA-1	SFR05206	SWUSl0079780
OG0014239					augustus_masked-tulip_contig_281_pilon_pilon-processed-gene-237-mRNA-1	SFR21429	SWUSl0079590
OG0014240					maker-tulip_contig_666_pilon_pilon-augustus-gene-01-mRNA-1	SFR09825	SWUSl0041000
OG0014242					augustus_masked-tulip_contig_640_pilon_pilon-processed-gene-11-mRNA-1	SFR11677	SWUSl0135320
OG0014243					maker-tulip_contig_623_pilon_pilon-augustus-gene-450-mRNA-1	SFR17468	SWUSl0072160
OG0014247					maker-tulip_contig_334_pilon_pilon-augustus-gene-117-mRNA-1	SFR14740	SWUSl0052060
OG0014248					maker-tulip_contig_334_pilon_pilon-augustus-gene-120-mRNA-1	SFR14735	SWUSl0052100
OG0014250					augustus_masked-tulip_contig_424_pilon_pilon-processed-gene-2146-mRNA-1	SFR13765	SWUSl0150200
OG0014252					augustus_masked-tulip_contig_905_pilon_pilon-processed-gene-029-mRNA-1	SFR00916	SWUSl0045370
OG0014254					maker-tulip_contig_710_pilon_pilon-augustus-gene-022-mRNA-1	SFR10201	SWUSl0139370
OG0014260					maker-tulip_contig_331_pilon_pilon-augustus-gene-324-mRNA-1	SFR18382	SWUSl0113290
OG0014262					augustus_masked-tulip_contig_603_pilon_pilon-processed-gene-450-mRNA-1	SFR00454	SWUSl0063440
OG0014263					augustus_masked-tulip_contig_716_pilon_pilon-processed-gene-128-mRNA-1	SFR11601	SWUSl0082350
OG0014264					maker-tulip_contig_555_pilon_pilon-augustus-gene-274-mRNA-1	SFR15630	SWUSl0130260
OG0014266					augustus_masked-tulip_contig_422_pilon_pilon-processed-gene-011-mRNA-1	SFR19101	SWUSl0099130
OG0014267					maker-tulip_contig_161_pilon_pilon-augustus-gene-070-mRNA-1	SFR12163	SWUSl0077590
OG0014269					maker-tulip_contig_112_pilon_pilon-augustus-gene-369-mRNA-1	SFR04788	SWUSl0093680
OG0014272					augustus_masked-tulip_contig_198_pilon_pilon-processed-gene-324-mRNA-1	SFR18638	SWUSl0142470
OG0014274					maker-tulip_contig_209_pilon_pilon-augustus-gene-11-mRNA-1	SFR00376	SWUSl0064180
OG0014276					maker-tulip_contig_781_pilon_pilon-augustus-gene-510-mRNA-1	SFR13778	SWUSl0075310

## Sheet: Table S13.2
Table S13.2: Within the 119 OGs, seven Spodoptera exigua genes were differentially expressed and clustered in expression cluster 4.
Spodoptera exigua gene ID	Orthogroup	Upregulation in expression cluster	BLASTX annotation	InterProScan annotation
maker-tulip_contig_479_pilon_pilon-augustus-gene-3.53-mRNA-1	OG0013351	4	XP_022820193.1 nuclear pore complex protein DDB_G0274915-like [Spodoptera litura]	consensus disorder prediction
maker-tulip_contig_125_pilon_pilon-augustus-gene-0.325-mRNA-1	OG0014208	4	XP_022821674.1 trypsin, alkaline C-like [Spodoptera litura]	Tryp_SPc
maker-tulip_contig_710_pilon_pilon-augustus-gene-0.22-mRNA-1	OG0014254	4	AFH57166.1 REPAT46 [Spodoptera exigua]	Transcription activator MBF2
maker-tulip_contig_331_pilon_pilon-augustus-gene-3.24-mRNA-1	OG0014260	4	XP_022828046.1 uncharacterized protein LOC111357533 [Spodoptera litura], also known as mg7*
augustus_masked-tulip_contig_43_pilon_pilon-processed-gene-0.117-mRNA-1	OG0011092	4	XP_022817942.1 uncharacterized protein LOC111350556 [Spodoptera litura]
augustus_masked-tulip_contig_43_pilon_pilon-processed-gene-0.118-mRNA-1	OG0011092	4	XP_022817893.1 uncharacterized protein LOC111350507 [Spodoptera litura]
maker-tulip_contig_43_pilon_pilon-augustus-gene-0.28-mRNA-1	OG0011092	4	XP_022817893.1 uncharacterized protein LOC111350507 [Spodoptera litura]
*https://www.ncbi.nlm.nih.gov/search/all/?term=XP_022828046.1%20uncharacterized%20protein%20LOC111357533%20[Spodoptera%20litura
